# Supplementary material for: A role for core planar polarity proteins in cell contact-mediated orientation of planar cell division across the mammalian embryonic skin
Source: PubMed Central journal article supplement (PMC5431842; doi:10.1038/s41598-017-01971-2), 2017-05-12
Supplement: 41598_2017_1971_MOESM1_ESM.pdf [file 41598_2017_1971_MOESM1_ESM.pdf]

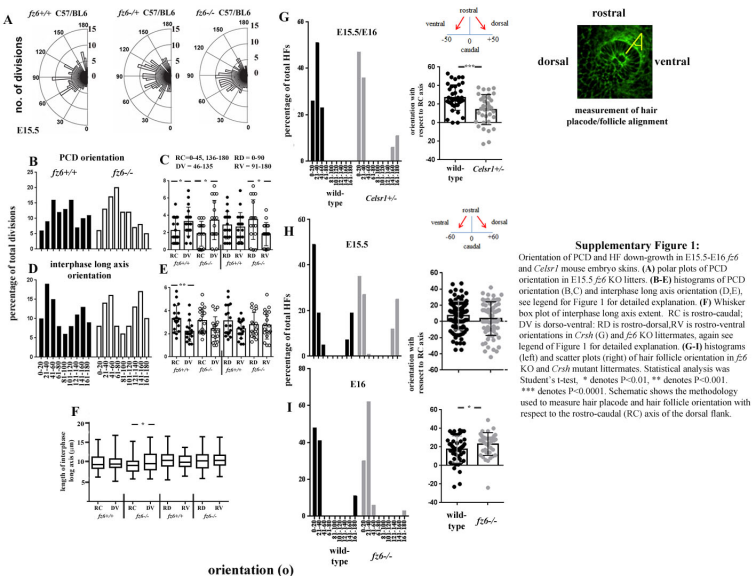

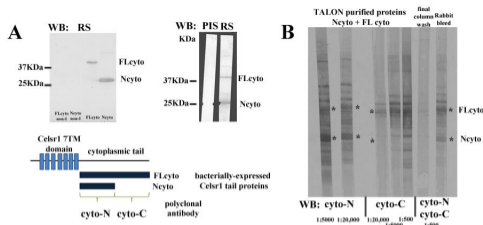

**H**

```
revrkhravlagkklqlddsatratllt rslncnntysegpdmrltalgestasldst
trdegvqlkvsvsgpargnhgepdasflpmskkaahgpdsdsdsdssdssdssdss
syasshtsdseddggeaedkwnpaggpahstpkadal anhpwagwpdes
lagsdseeeldtephikvetkvsvelhrqaqgnhcgdrpsdpesgvlakpvavlss
qpqeqrkglknkvtyppplpeqplksrrerekladeeqsptsrrtsslgsgdgvhat
devitlktpprepgrehlmgvamnr tgsaqangsdsekp
```

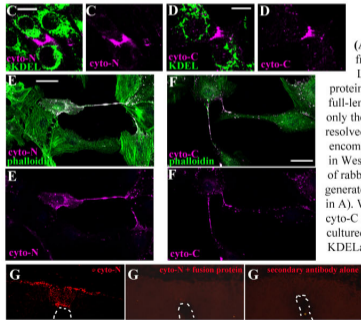

**Supplementary Figure 2: validation of Celsr1-specific antibodies**

(A) Western blot analysis of bacterially-expressed tail proteins against whole sera from rabbits (RS) immunised with a full-length Celsr1 cytoplasmic tail protein. Lysates from bacterial preparations induced to express different sized Celsr1 tail proteins were run alongside controls which were non-induced preparations (non-I). The full-length Celsr1 tail protein (FLcyto) resolved at around 42KDa. A protein encompassing only the N-terminal portion (Ncyto) of the Celsr1 tail (Formstone et al, 2010; Qu et al, 2010) resolved at 28KDa. Schematic shows relative portions of the Celsr1 cytoplasmic tail encompassed by each protein. Sera from FLcyto immunised rabbits recognised both proteins in Western blots, pre-immune sera (PIS) did not. (B) Affinity purification of the same batch of rabbit sera against Ncyto protein and subsequently against FLcyto (see methods) generated two distinct polyclonal antibodies, cyto-N and cyto-C respectively (see schematic in A). Whereas cyto-N antibody recognised both Ncyto and FLcyto (see schematic in A), cyto-C antibody recognised FLcyto but not Ncyto. (C-F) immunohistochemistry of cultured L cells (C,D) and MDCK cells (E,F) stably expressing a full-length Celsr1 cDNA. KDEL and phalloidin mark golgi and F-actin respectively. Both cyto-N and cyto-C antibodies recognise a protein which enriches at cell interfaces both in L-cells, which normally exist as isolated cells in culture due to their lack of adhesion components, and in adhesive MDCK cells. (G) cyto-N antibody staining was lost from the roof plate of the E13.5 mouse spinal cord following pre-incubation of affinity purified rabbit sera with Ncyto bacterially expressed fusion proteins prior to immunohistochemistry. (H) amino acid sequence of Celsr1 cytoplasmic tail. Bold regular text shows region used to affinity purify cyto-N, text in italics denotes region corresponding to cyto-C. blue labels potential palmitoylated cysteines, red labels potential phosphorylation sites.

expressed fusion proteins prior to immunohistochemistry. (H) amino acid sequence of Celsr1 cytoplasmic tail. Bold regular text shows region used to affinity purify cyto-N, text in italics denotes region corresponding to cyto-C. blue labels potential palmitoylated cysteines, red labels potential phosphorylation sites.

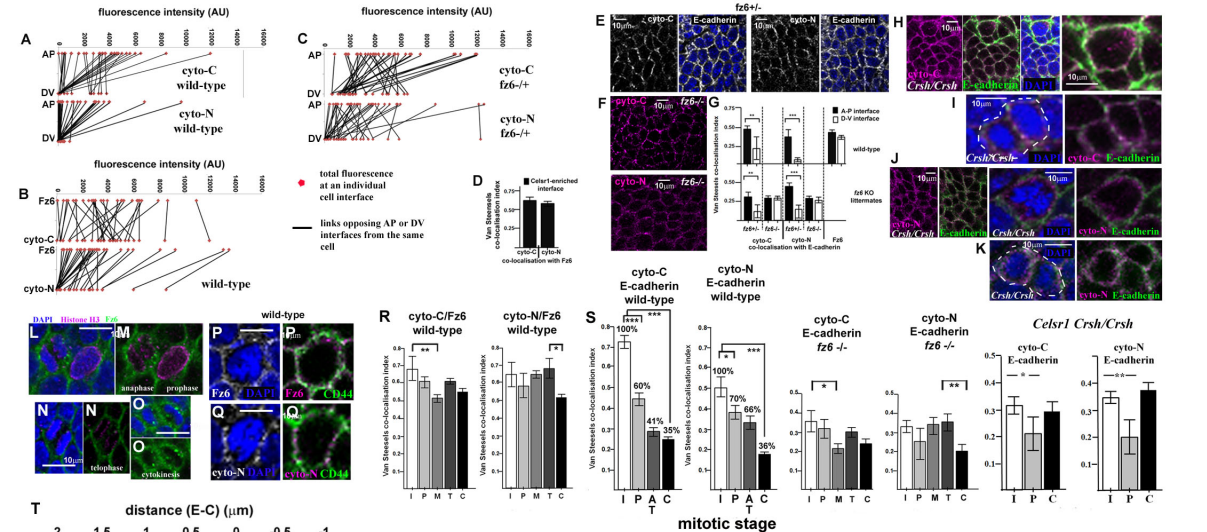

### Supplementary Figure 3: quantification of Celsr1 protein variant distribution in the skin epithelium during interphase and mitosis.

(A-C) Measurements of fluorescence intensity at individual cell interfaces. AP denotes anterior-posterior, DV denotes dorso-ventral  $n > 25$  interfaces from 4 images taken from at least 3 different embryos in each case. Fluorescent intensity at cell interfaces was normalised against fluorescent intensity at the centre of the nucleus. In (A), bottom panel, cyto-N: low or no fluorescence at multiple cell interfaces was consistent with fragmentation of cyto-N staining. (B) Staining levels for Fz6 and cyto-C were similar at individual A-P interfaces across a field of cells, whereas many Fz6-expressing A-P oriented interfaces showed no visible cyto-N staining. Notably, where cyto-N staining was not visible, Fz6 staining was mostly isotropic. (C) both cyto-C and cyto-N staining exhibited a mixture of anisotropic enrichment to opposing cell interfaces and isotropic cell surface expression in  $fz6 +/ -$  skins. (D) co-localisation index of Fz6 with either cyto-C or cyto-N staining, mean and SD are shown. We used Van Steensel's co-localisation approach (Van Steensel et al., 1996; Bolte and Cordelières, 2006 and methods).

(E,F) cyto-C and cyto-N staining in heterozygous  $fz6$  KO skins, anterior is to the left, dorsal is to the top. (G) histogram showing the co-localisation indices (Van Steensel) of cyto-C and cyto-N respectively with Fz6 in progenitor cells exhibiting Celsr1 asymmetry. Mean and SEM are shown.  $> 15$  cells were analysed in each case. Asterisks indicate two-tailed t-test, \*\*  $p < 0.001$ , \*\*\*  $p < 0.0001$ . (H-K) cyto-C and cyto-N staining in *Celsr1 Crsh/Crsh* homozygote skin during interphase and mitosis. White lines mark basal cell at cytokinesis.

(L-O) Phospho-histone H3 labelling of skin basal cells during mitosis as a marker of progression in mitosis. (P,Q) Fz6 (P) and cyto-N (Q) staining co-labels the CD44-positive cell surface during early mitosis. Representative images,  $n > 3$ . (R,S) protein co-localisation was quantified using JACoP, an intensity-correlation-coefficient-based (ICCB) approach available in Image-J (Bolte and Cordelières, 2006) used previously to quantify co-localisation of Celsr1 with E-cadherin at the plasma membrane of epidermal progenitor cells (Devenport et al., 2011). We used Van Steensel's approach however, not the Manders' coefficient (see Methods for explanation). I, interphase; P, prophase; M, metaphase; A, anaphase; T, telophase; C, cytokinesis.  $n = 10$  cells for each stage. Asterisks indicate two-tailed t-test, \* denotes  $p < 0.01$ , \*\* denotes  $p < 0.001$ , \*\*\* denotes  $p < 0.0001$ . (S) percentage value above each bar represents proportion of co-localisation compared to interphase (100%). (T) We also used an object-based analysis (Bolte and Cordelières, 2006) to measure the distance between the centroid of the nucleus of each cell in prophase and the centroid of individual neighbouring Celsr1 (C) and E-cadherin (E) domains. Schematic shows method of measurement.

Value C is the distance ( $\mu\text{m}$ ) between the centroid of an individual Celsr1 expression domain and the centroid of the nucleus. Value E is the distance ( $\mu\text{m}$ ) between the centroid of a nearest neighbour E-cadherin expression domain and the same nucleus. The difference between these measurements (E-C) was calculated and is shown as a scatter plot. Those which fell below the optical resolution of the confocal microscope (estimated as  $0.3 \mu\text{m}$  based on a 63X oil immersion Plan Apochromat objective, NA 1.4) were assigned as overlapping. Higher E-C values for cyto-C (mean of 0.38) supported an intracellular distribution whereas lower E-C values for cyto-N (mean of 0.16) argued that these Celsr1 protein variants were not retained within intracellular vesicles during mitosis. Unexpectedly, several cyto-N-expressing domains located beyond their nearest neighbouring E-cadherin domain (i.e. some Celsr1 proteins were further from the nucleus relative to E-cadherin). Possibly, these data reveal cell surface Celsr1 versus recycling E-cadherin/Celsr1 populations at the cortex

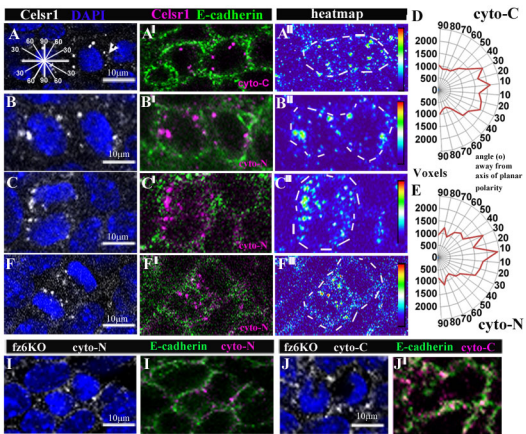

**Supplementary Fig.4: All Celsr1 protein variants appear in intracellular vesicles following chromatid segregation.** Their intracellular distribution at telophase/cytokinesis is biased along the A-P axis (D,E). They re-appeared at the plasma membrane at cytokinesis as described previously for Celsr1 (Devenport et al, 2011). (A-F, G-J) immunostaining of frozen sections, representative images  $n > 3$ . (A) arrowhead labels cell surface Celsr1. The method used to measure the angle of distribution of Celsr1-fluorescence within intracellular puncta during telophase and cytokinesis with respect to the axis of surrounding planar polarity, as shown in (D,E), is indicated in (A).  $n > 30$  mitoses in each case. (F-F'') representative image,  $n = 6/36$  cyto-C and cyto-N-stained divisions. white dashed lines mark the edges of the mitotic cell. Anterior is towards the left, dorsal is roughly towards the top in all images.
